# Supplementary material for: Highly stretchable and fatigue resistant hydrogels with low Young's modulus as transparent and flexible strain sensors
Source: Royal Society of Chemistry journal article supplement (doi:10.1039/c8tc02583e), 2018-01-01
Supplement: c8tc02583e7.pdf [file c8tc02583e7.pdf]

## Highly stretchable, low Young's modulus and fatigue resistance hydrogels as transparent and flexible strain sensors

Rui Chen<sup>#</sup>, Xiubin Xu<sup>#,\*</sup>, Chuanghong Xiao, Minhuan Liu, Jianjia Huang, Danfeng Yu,  
Zhengping Wang, Xu Wu<sup>\*</sup>

Department of Chemistry and Chemical Engineering, Guangzhou University, Guangzhou  
510006, China

<sup>#</sup> These two authors contributed equally to this paper.

<sup>\*</sup> Corresponding authors.

E-mail address: xuxb@gzhu.edu.cn (X. Xu), xuwu@gzhu.edu.cn (X. Wu).

Table S1. The impact of Py concentration on the stretchability of hydrogels

| Concentration of Py aqueous solution(mL/mL) | 0 | 0.001 | 0.002 | 0.004 | 0.006 | 0.008 | 0.01 |
|---------------------------------------------|---|-------|-------|-------|-------|-------|------|
| Stretchability(time)                        | 9 | 8     | 7     | 5     | 4     | 3     | 2    |

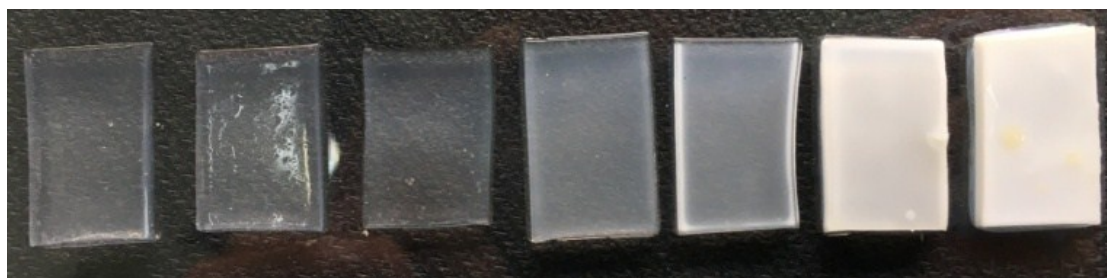

**Figure S1.** The photography of the hydrogels after dipped in different concentration of Py aqueous solution for 3 min.

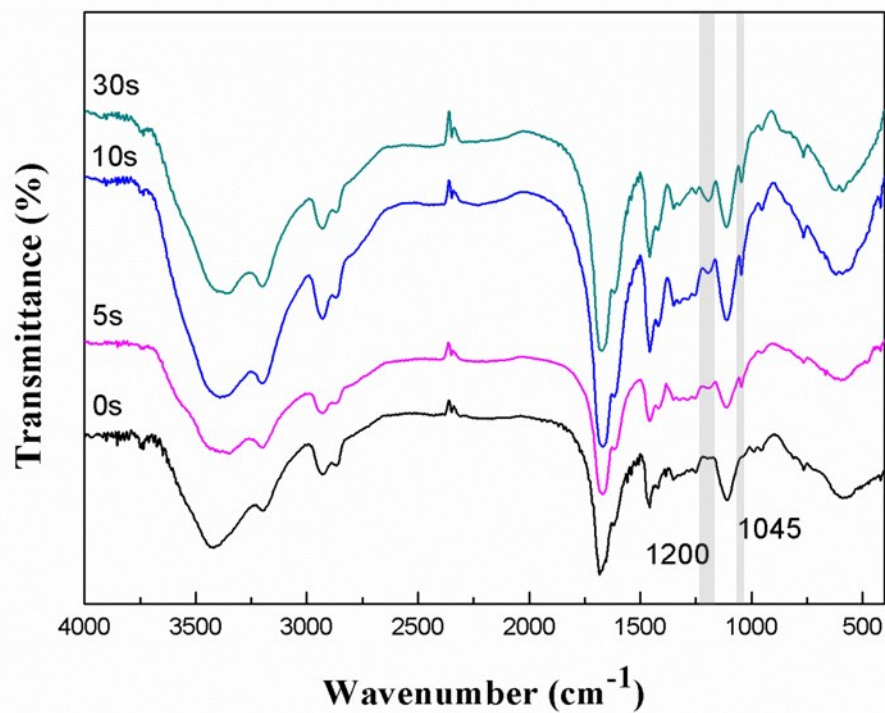

**Figure S2.** The FTIR spectra of the conductive hydrogels immersed in Py solution for different time: 0s, 5s, 10 and 30. We can find that, with the time in Py solution increased, the new peaks at 1200 and 1045  $\text{cm}^{-1}$ , which can be ascribed to the stretching vibrations of polypyrrole,[1] were enhanced, confirming the amount of PPy increases with the time.

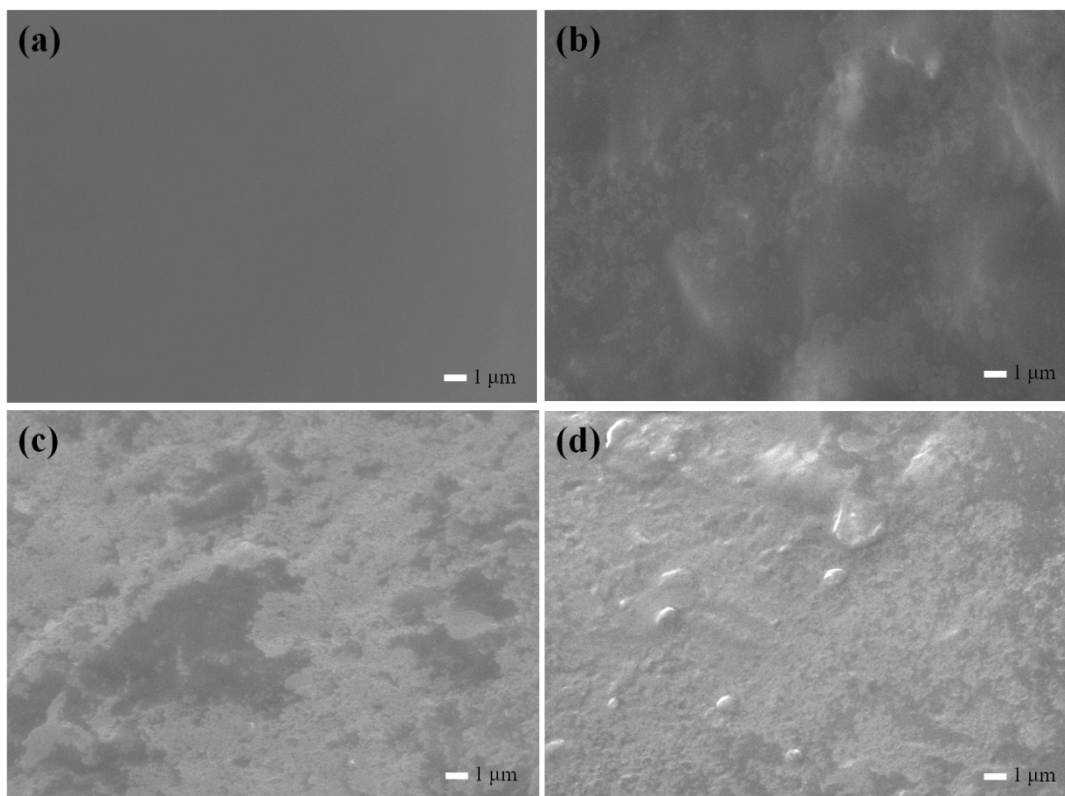

**Figure S3.** The SEM images of the hydrogels with different immersing time: 0s (a), 5s (b), 10s (c) and 30s (d).

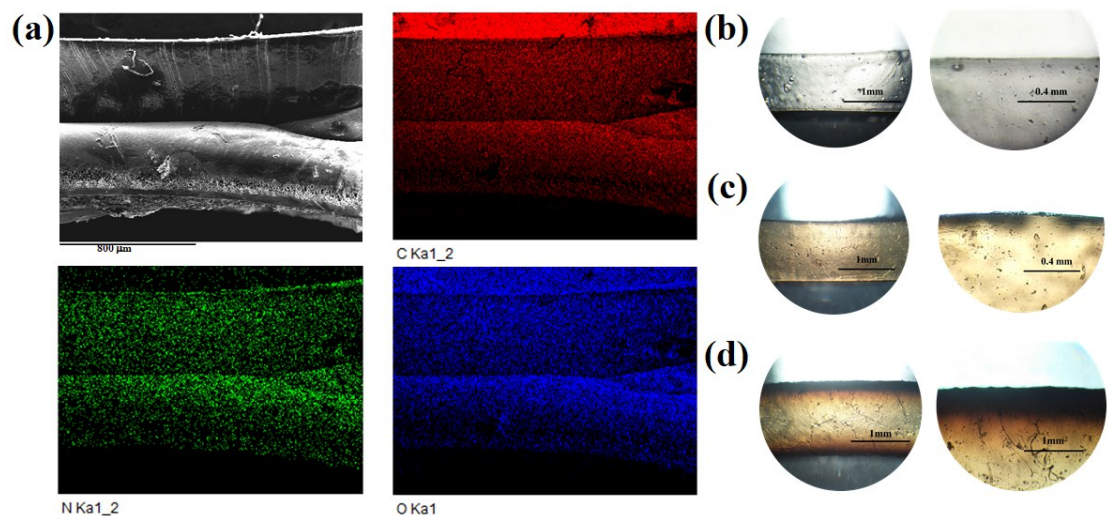

**Figure S4.** SEM images and mapping analysis of C, N, O element of the hydrogels with 30 s (a). The optical microscopy images of the cross-section of the hydrogels with immersing in Py solution for 0s (b), 5s (c) and 30 s (d).

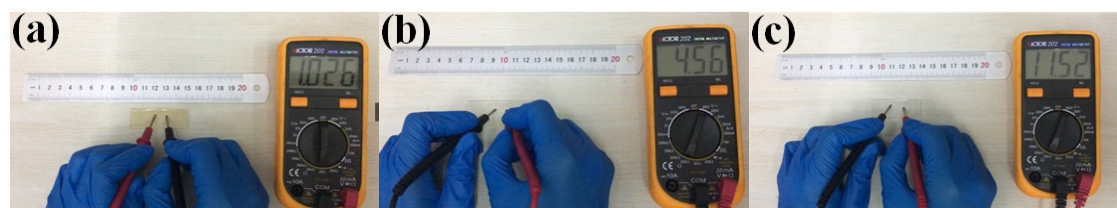

**Figure S5.** The electric resistance images of three kinds of hydrogels: a) hydrogels with PPy, b) hydrogels with PPy after dialysing against water to remove the ions, c) hydrogels without PPy.

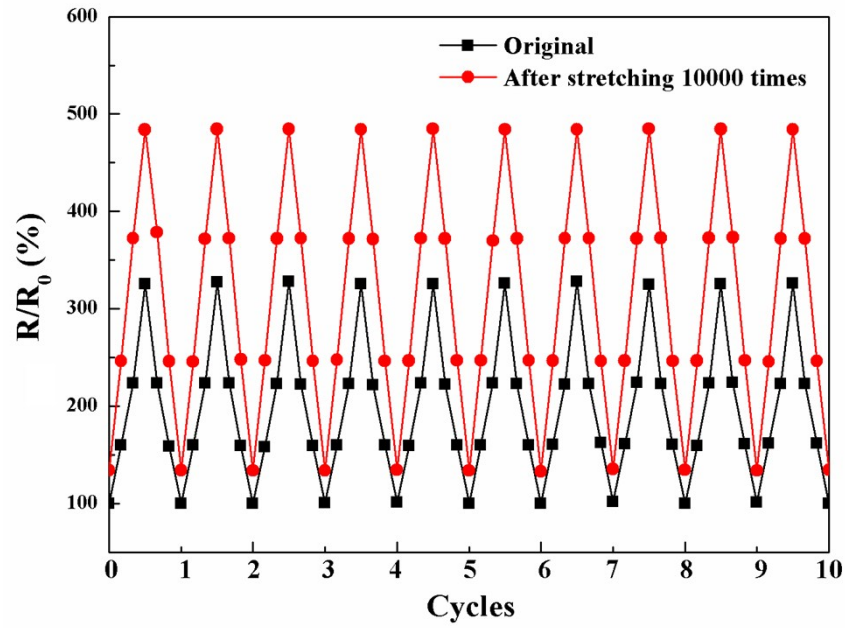

**Figure S6.** The relative resistance changes of the hydrogels were successively recorded with stretching 200% after 10000 stretching times.

**Reference:**

[S1] L. Al-Mashat, H.D. Tran, W. Wlodarski, R.B. Kaner, K. Kalantar-zadeh, Polypyrrole nanofiber surface acoustic wave gas sensors, *Sensors Actuators B: Chem.*, 134 (2008) 826-831.
